# Supplementary material
Source: PubMed Central journal article supplement (PMC2688964)
Supplement: 0903233106_0903233106SI.pdf [file 0903233106_0903233106SI.pdf]

# Supporting Information

Tyner et al. 10.1073/pnas.0903233106

## SI Experimental Procedures

**Collection of Patient Samples and Cell Culture.** All clinical samples were obtained with informed consent with approval by the Institutional Review Boards of Stanford University and Oregon Health and Science University. Patient 07-079 was enrolled on an IRB-approved protocol at Washington University in St. Louis (04-1065; Principal Investigator, Tim Graubert). Blood or bone marrow from patients was separated on a Ficoll gradient. Cells were cultured in R10 [RPMI-1640 medium supplemented with 10% FBS (Atlanta Biologicals), L-glutamine, penicillin/streptomycin (Invitrogen), and fungizone (Invitrogen)], supplemented with  $10^{-4}$  M 2-mercaptoethanol (Sigma); 293 T17 and BA/F3 cells were obtained from American Type Culture Collection. HEL cells were obtained from the German National Resource Centre for Biological Material (DSMZ); 293 T17 cells were maintained in DMEM supplemented with 10% FBS (Atlanta Biologicals), L-glutamine, penicillin/streptomycin (Invitrogen), and fungizone (Invitrogen). HEL and BA/F3 cells were maintained in R10, with BA/F3 cells also requiring WEHI-conditioned media.

**Cell Viability, Proliferation, and Colony Assays.** For proliferation and viability assays, cells were incubated for 72 h (density per well of 5,000 for cell lines and 50,000 for primary cells) in the presence of dose gradients of thrombopoietin (Peprotech), AG490 (EMD Biosciences), or midostaurin (PKC412) (LC Laboratories), at which point a CellTiter 96 AQueous. One solution cell proliferation assay was performed (Promega). For determination of factor-independent growth, BA/F3 cells were cultured in R10 in the absence or presence of midostaurin (0–250 nM). Total viable cells were determined daily by using PI exclusion on a Guava cell counter (Guava Technologies). Two independently derived clones of MPL<sup>1886InsGG</sup>-expressing BA/F3 cells were tested for WEHI-independent growth capacity. Midostaurin was refreshed each day. For colony assays, 200,000 cells were incubated in AG490 or midostaurin in methocult containing IL-3, GM-CSF, and SCF (StemCell Technologies). Ten days later, colonies were counted manually with brightfield microscopy. For siRNA knockdown in BA/F3 cells, electroporation conditions were 400 V, 100  $\mu$ s, and 1 pulse.

**Small Interfering RNA Knockdown Using Tyrosine Kinase Library.** Patient blood or bone marrow was prepared as above and  $2.25 \times 10^7$  cells were resuspended in 4.2 mL of siPORT buffer (Ambion). Cells were aliquoted at 42  $\mu$ L per well onto a 96-well electroporator (Ambion), and 2  $\mu$ L of siRNA at 20  $\mu$ M was added to each well [tyrosine kinase library (Dharmacon) with single and pooled nonspecific siRNA, as well as siRNA against EPHA5, EPHA6, src-related kinase lacking C-terminal regulatory tyrosine and N-terminal myristylation (SRMS), apoptosis-associated tyrosine kinase (AATK), LMTK3, N-RAS, K-RAS (all from Dharmacon) added separately]. Targeting sequences for each pool of 4 siRNA constructs for all positive hits are listed in Table S2. Cells were electroporated at 1110 V (equivalent of 150 V per well), 200  $\mu$ s, 2 pulses, and 50,000 cells per well were replated into triplicate plates containing 100  $\mu$ L per well of culture media. For determination of cell viability, cells were subjected to the CellTiter 96 AQueous one solution cell proliferation assay (MTS) (Promega). All values were normalized to the median plate value.

**Immunoblotting and Flow Cytometry.** For BA/F3 stimulation, cells were serum starved overnight. Cells were stimulated for 15 min with 0–10 ng/mL recombinant thrombopoietin (Peprotech). For JAK2 silencing in primary cells, CMML cells were incubated with single or pooled JAK2 or nonspecific siRNA and electroporated at 150 V, 200  $\mu$ s, and 2 pulses, and cultured for 48 h. All cells were lysed in sample buffer (75 mM Tris pH 6.8, 3% SDS, 15% glycerol, 8%  $\beta$ -mercaptoethanol, 0.1% bromophenol blue) and separated by SDS/PAGE. Proteins were transferred to PVDF membranes (Millipore) and subjected to immunoblot analysis with antibodies specific for MPL (Millipore), total or phospho-STAT5 (BD Biosciences), total or phospho JAK2, STAT3, ERK1/2, AKT (Cell Signaling), or  $\beta$ -actin (Millipore). For flow cytometry, cells from patient 07-079 were immunostained with antibodies specific for CD3 and CD33, and each single-positive population was sorted on a BD FACSaria. Genomic DNA was isolated (Qiagen) and sequencing performed as described below.

**Cloning and Creation of Stable Cell Lines.** For cloning of MPL, RNA was extracted from HEL cells (Qiagen) and reverse-transcribed into cDNA (SuperScript III; Invitrogen) by using random hexamer primers. MPL was PCR amplified by using the forward primer, 5' CACCACACAGTGGCGGAGAAGATG 3', and the reverse primer, 5' GCCTAATTGTGAGGGCAGAC 3', and cloned into the Gateway vector, pENTR/D-TOPO (Invitrogen). MPL was then cloned into MSCV-IRES-GFP (MIG) by performing an LR recombination reaction. Introduction of the 2 base pair GG insertion (1886InsGG) was carried out by using the Quikchange XL-II mutagenesis kit (Stratagene), and MPL W515L was kindly provided by Ross Levine (Sloan-Kettering, New York). Retrovirus expressing MIG-MPL WT, 1886InsGG, or W515L was propagated in 293 T17 cells by cotransfection of each respective MIG-MPL construct with the EcoPack plasmid (kindly provided by Richard Van Etten, Tufts-New England Medical Center, Boston) by using Eugene (Roche). One milliliter of viral supernatant was mixed with polybrene (5 mg/mL), Hepes (7.5 mM), and  $10^6$  BA/F3 cells and centrifuged at  $2,500 \times g$  for 90 min at 30 °C. GFP positive cells were sorted on a BD FACSaria (BD Biosciences) after 48 h.

**Sequencing Analyses.** Genomic DNA from patient samples (Qiagen) was used to sequence JAK2, K-RAS, and MPL by using previously described primers (1). For MPL exon 12, individual copies of the PCR product were cloned and sequenced. Total RNA (Qiagen) from patient 07-079 was used to synthesize cDNA (Invitrogen SuperScript III) with random hexamer primers and MPL was amplified by using the forward primer, 5' CAGGAC-TACAGACCCACAG 3', and the reverse primer, 5' AGCCT-GCCTGTGGAGAAAG 3'. Individual copies were cloned and sequenced.

**Allele-Specific PCR.** Allele-specific PCR for KIT<sup>D816V</sup> was performed as previously described (2). For MPL<sup>1886InsGG</sup>, quantitative PCR was performed on genomic DNA by using SYBR Green qPCR SuperMix (Invitrogen) and a DNA Engine Opticon 2 system for real-time PCR (Bio-Rad) with the following primers: 5' CAC ACT ACA GGA GAC TGA GGC 3' and 5' GGC TGC TGC CAA TAG CTT CC 3'.

**Statistical Analyses.** For RAPID screens, a Student's *t* test was carried out for each well in comparison to single and pooled

nonspecific controls. The mean of the 2-tailed  $P$  value was evaluated for significance. Data points exceeding 2 SDs of the mean below the mean value on the plate, and  $P < 0.05$  were considered significant.

For cell proliferation, cell viability, and colony assays, a Student's  $t$  test was carried out for each dose or time point compared with the relevant control cell line or the no drug control.

1. Sjoblom T, et al. (2006) The consensus coding sequences of human breast and colorectal cancers. *Science* 314:268–274.
2. Corless CL, et al. (2006) Allele-specific polymerase chain reaction for the imatinib-resistant KIT D816V and D816F mutations in mastocytosis and acute myelogenous leukemia. *J Mol Diagn* 8:604–612.





**a**

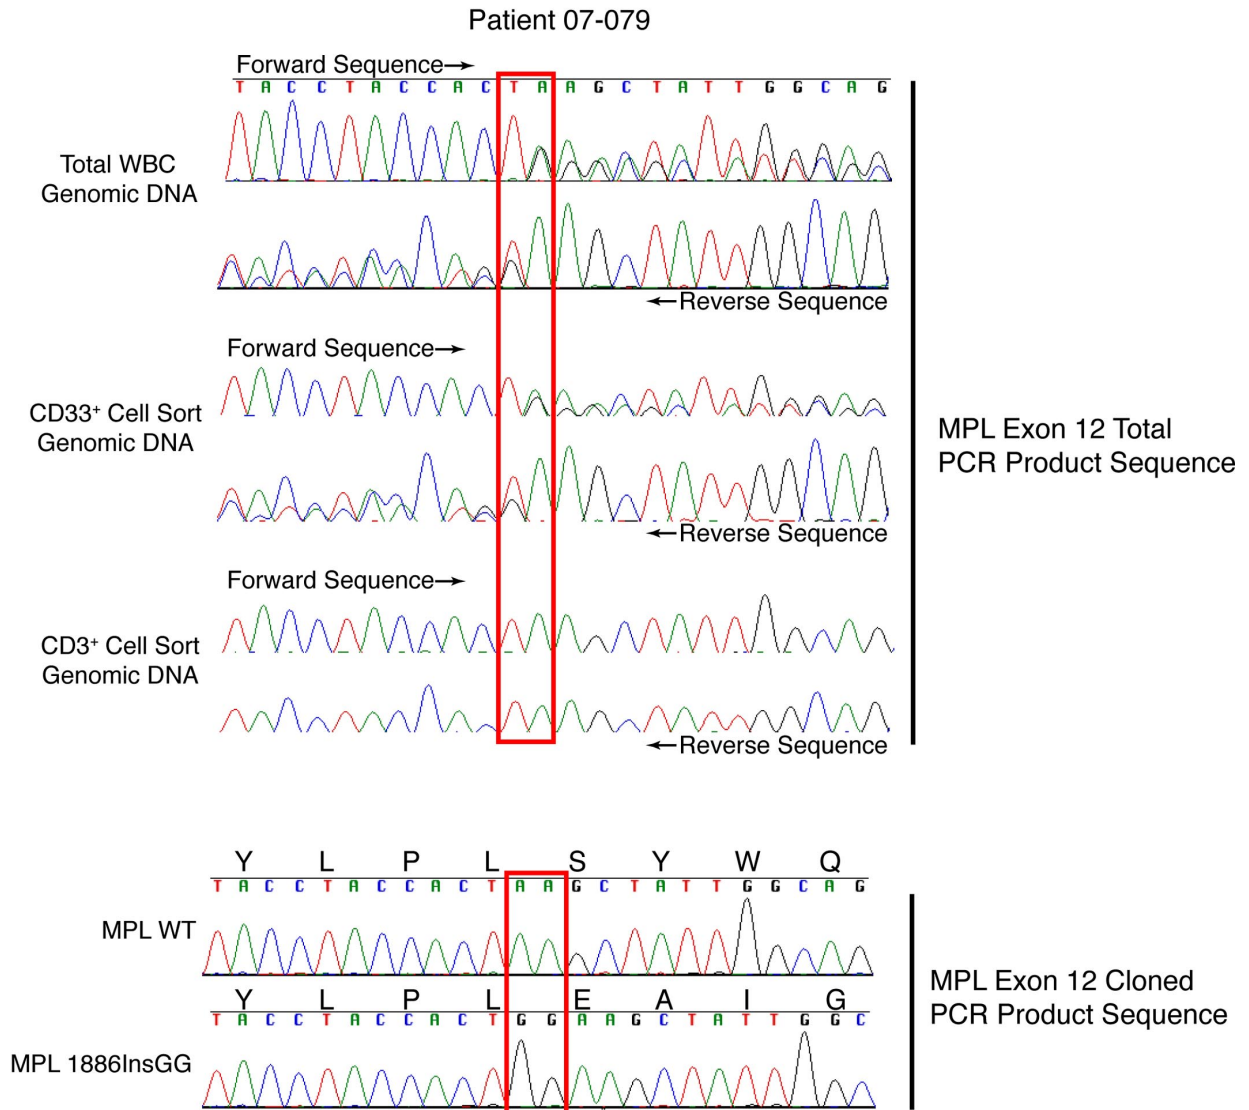

**b**

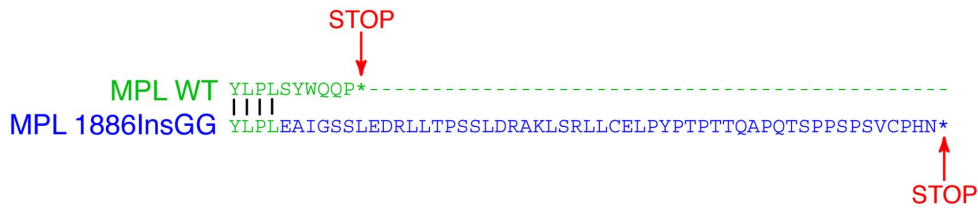

**Fig. S3.** Identification of a novel MPL mutation in patient 07-079. (A) MPL was sequenced in genomic DNA from patient 07-079 and found to have a 2-base-pair insertion (1886InsGG) in exon 12. Exon 12 PCR products were cloned and individual clones confirmed equal abundance of exon 12 WT and 1886InsGG in patient 07-079. Frozen viable cells from patient 07-079 were immunostained with antibodies specific for CD3 and CD33, and CD3<sup>+</sup> or CD33<sup>+</sup> cells were sorted by flow cytometry, and DNA was isolated from each cell population. Sequencing revealed that only the CD33<sup>+</sup> cell population exhibited the MPL<sup>1886InsGG</sup> mutation, indicating that it is an acquired, somatic mutation. (B) Hypothetical translation of the carboxy terminus of resultant proteins from MPL<sup>WT</sup> and MPL<sup>1886InsGG</sup>.





**a**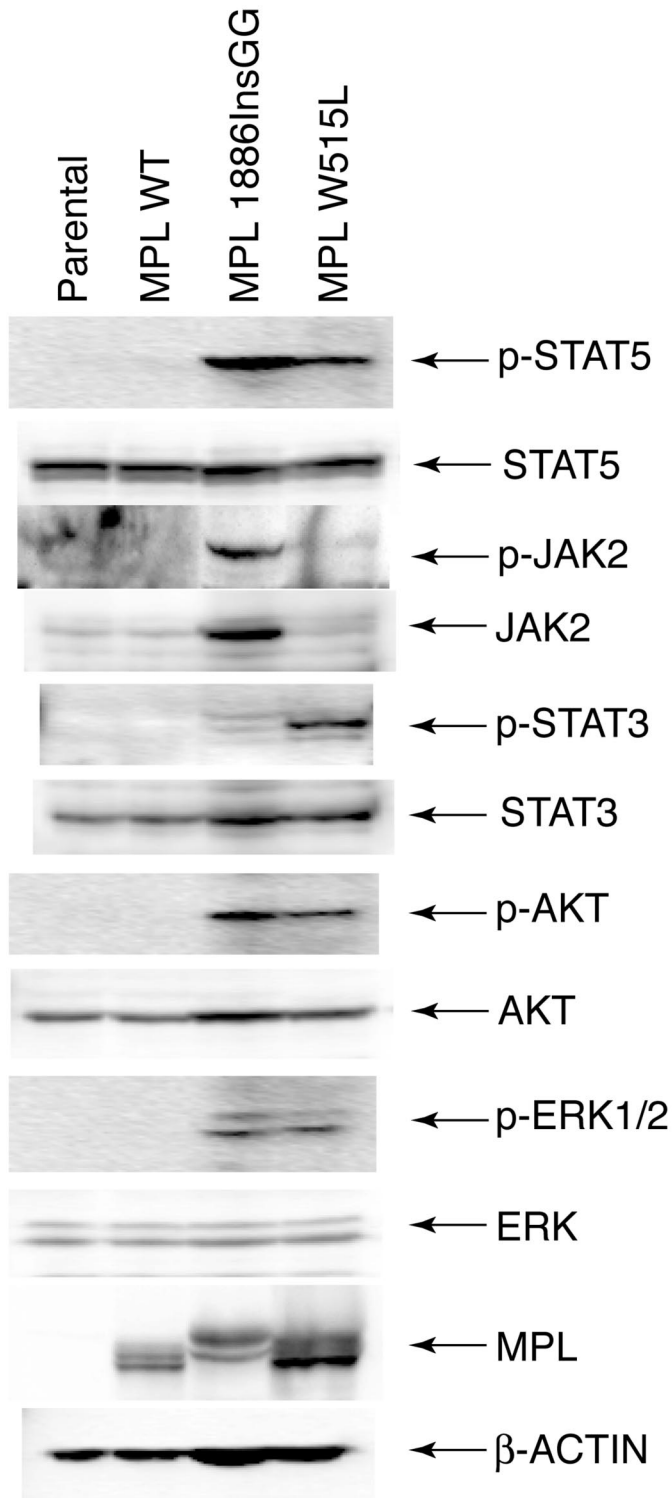**b**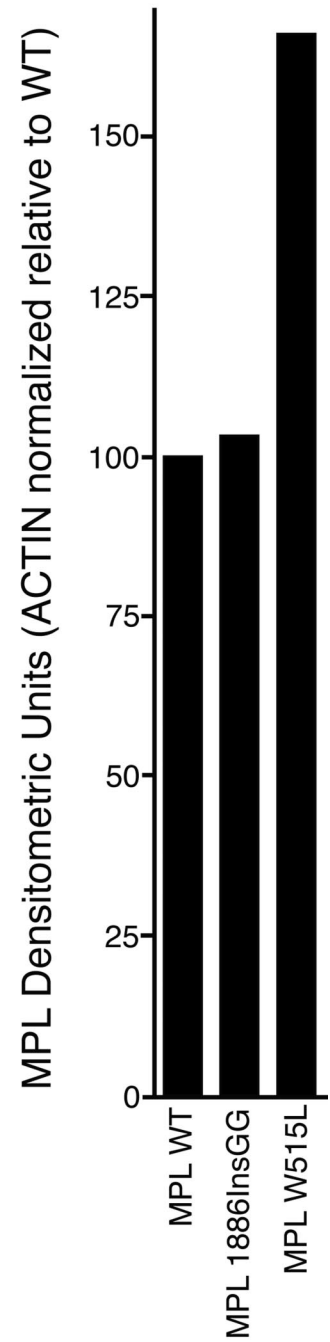

**Fig. S5.** MPL<sup>1886InsGG</sup> is constitutively active. (A) Factor-independent BA/F3 cells expressing MPL 1886InsGG or W515L as well as parental BA/F3 cells or those stably expressing MPL WT, were serum starved overnight. Whole-cell lysates were subjected to immunoblotting with antibodies specific for total or phospho-JAK2, STAT5, STAT3, AKT, and ERK as well as MPL and  $\beta$ -actin. (B) Densitometric analysis of MPL levels from A. MPL levels were normalized to actin and levels of actin-normalized MPL WT, 1886InsGG, and W515L are shown relative to MPL WT.







Table S1. Complete RAPID results on patient 07-079

| Gene   | Viability | SE | t test 1 | t test 2 | Average of t test |
|--------|-----------|----|----------|----------|-------------------|
| ABL1   | 128       | 6  | 0.1340   | 0.3939   | 0.2640            |
| ABL2   | 106       | 6  | 0.4862   | 0.1866   | 0.3364            |
| ACK1   | 110       | 10 | 0.7658   | 0.5854   | 0.6756            |
| ALK    | 118       | 4  | 0.8163   | 0.5552   | 0.6858            |
| AXL    | 110       | 9  | 0.7719   | 0.4963   | 0.6341            |
| BLK    | 113       | 3  | 0.7613   | 0.4137   | 0.5875            |
| BMX    | 105       | 2  | 0.2510   | 0.0319   | 0.1415            |
| BTK    | 94        | 2  | 0.0659   | 0.0274   | 0.0466            |
| TP53RK | 99        | 3  | 0.0956   | 0.0773   | 0.0864            |
| CSF1R  | 98        | 2  | 0.0190   | 0.0908   | 0.0549            |
| CSK    | 115       | 3  | 0.9399   | 0.0729   | 0.5064            |
| DDR1   | 98        | 5  | 0.2032   | 0.0468   | 0.1250            |
| DDR2   | 120       | 5  | 0.6568   | 0.5932   | 0.6250            |
| STYK1  | 104       | 7  | 0.4125   | 0.1689   | 0.2907            |
| EGFR   | 105       | 5  | 0.4041   | 0.0669   | 0.2355            |
| EPHA1  | 111       | 5  | 0.6729   | 0.3198   | 0.4963            |
| EPHA2  | 115       | 4  | 0.9541   | 0.0981   | 0.5261            |
| EPHA3  | 111       | 2  | 0.5819   | 0.1037   | 0.3428            |
| EPHA4  | 97        | 2  | 0.0205   | 0.0943   | 0.0574            |
| EPHA7  | 122       | 9  | 0.5634   | 0.7165   | 0.6399            |
| EPHA8  | 99        | 1  | 0.0501   | 0.0648   | 0.0574            |
| EPHB1  | 92        | 6  | 0.1440   | 0.0342   | 0.0891            |
| EPHB2  | 96        | 8  | 0.2755   | 0.1070   | 0.1913            |
| EPHB3  | 88        | 7  | 0.1243   | 0.0475   | 0.0859            |
| EPHB4  | 88        | 10 | 0.2049   | 0.1093   | 0.1571            |
| EPHB6  | 100       | 3  | 0.1888   | 0.0137   | 0.1012            |
| ERBB2  | 93        | 6  | 0.1844   | 0.0247   | 0.1045            |
| ERBB3  | 88        | 5  | 0.0982   | 0.0221   | 0.0602            |
| ERBB4  | 116       | 9  | 0.9234   | 0.9679   | 0.9457            |
| FER    | 109       | 6  | 0.2909   | 0.5526   | 0.4217            |
| FES    | 103       | 5  | 0.3185   | 0.0291   | 0.1738            |
| FGFR1  | 101       | 6  | 0.2895   | 0.0677   | 0.1786            |
| FGFR2  | 107       | 12 | 0.6637   | 0.4921   | 0.5779            |
| FGFR3  | 98        | 9  | 0.3690   | 0.1425   | 0.2557            |
| FGFR4  | 93        | 7  | 0.1720   | 0.0911   | 0.1315            |
| FGR    | 97        | 11 | 0.3618   | 0.1977   | 0.2798            |
| FLT1   | 104       | 5  | 0.3765   | 0.1117   | 0.2441            |
| FLT3   | 104       | 3  | 0.2674   | 0.0282   | 0.1478            |
| FLT4   | 112       | 2  | 0.5691   | 0.3895   | 0.4793            |
| FRK    | 107       | 9  | 0.4920   | 0.5050   | 0.4985            |
| FYN    | 84        | 7  | 0.1238   | 0.0302   | 0.0770            |
| HCK    | 87        | 6  | 0.1073   | 0.0305   | 0.0689            |
| IGF1R  | 100       | 4  | 0.0623   | 0.1555   | 0.1089            |
| INSR   | 103       | 5  | 0.3016   | 0.0853   | 0.1935            |
| ITK    | 94        | 13 | 0.3705   | 0.2420   | 0.3062            |
| JAK1   | 81        | 9  | 0.1296   | 0.0528   | 0.0912            |
| JAK2   | 34        | 4  | 0.0118   | 0.0009   | 0.0064            |
| JAK3   | 87        | 3  | 0.0580   | 0.0089   | 0.0334            |
| KDR    | 114       | 8  | 0.8917   | 0.8560   | 0.8738            |
| LMTK2  | 114       | 8  | 0.8872   | 0.8044   | 0.8458            |
| KIT    | 117       | 1  | 0.7965   | 0.9733   | 0.8849            |
| LCK    | 102       | 5  | 0.3000   | 0.0284   | 0.1642            |
| LTK    | 81        | 8  | 0.1034   | 0.0371   | 0.0702            |
| LYN    | 96        | 8  | 0.2713   | 0.0643   | 0.1678            |
| MATK   | 92        | 6  | 0.1536   | 0.0281   | 0.0908            |
| MERTK  | 90        | 7  | 0.1539   | 0.0478   | 0.1009            |
| MET    | 110       | 4  | 0.5657   | 0.2964   | 0.4310            |
| MST1R  | 92        | 8  | 0.1888   | 0.0709   | 0.1298            |
| MUSK   | 95        | 3  | 0.1293   | 0.0031   | 0.0662            |
| NTRK1  | 116       | 11 | 0.9129   | 0.9828   | 0.9478            |
| NTRK2  | 109       | 8  | 0.6588   | 0.3774   | 0.5181            |
| NTRK3  | 100       | 1  | 0.0933   | 0.0445   | 0.0689            |
| PDGFRA | 83        | 9  | 0.1332   | 0.0669   | 0.1000            |
| PDGFRB | 89        | 8  | 0.1740   | 0.0827   | 0.1284            |
